# Supplementary material
Source: publisher figshare collection journal article supplement (https://acs.figshare.com/ndownloader/files/26905023)
Supplement: Supplementary file 1 [file 26905023]

**High power factor Ag/Ag<sub>2</sub>Se composite film for flexible thermoelectric generator**

Qi Gao<sup>a</sup>, Wu Wang<sup>b</sup>, Yao Lu <sup>a,b</sup>, Kefeng Cai<sup>a\*</sup>, Yating Li<sup>a</sup>, Zixing Wang<sup>a</sup>,

Miaomiao Wu<sup>a</sup>, Changjun Huang<sup>a</sup>, Jiaqing He<sup>b\*</sup>

**Corresponding authors**

\*Email address: [kfcai@tongji.edu.cn](mailto:kfcai@tongji.edu.cn); [hejq@sustc.edu.cn](mailto:hejq@sustc.edu.cn)

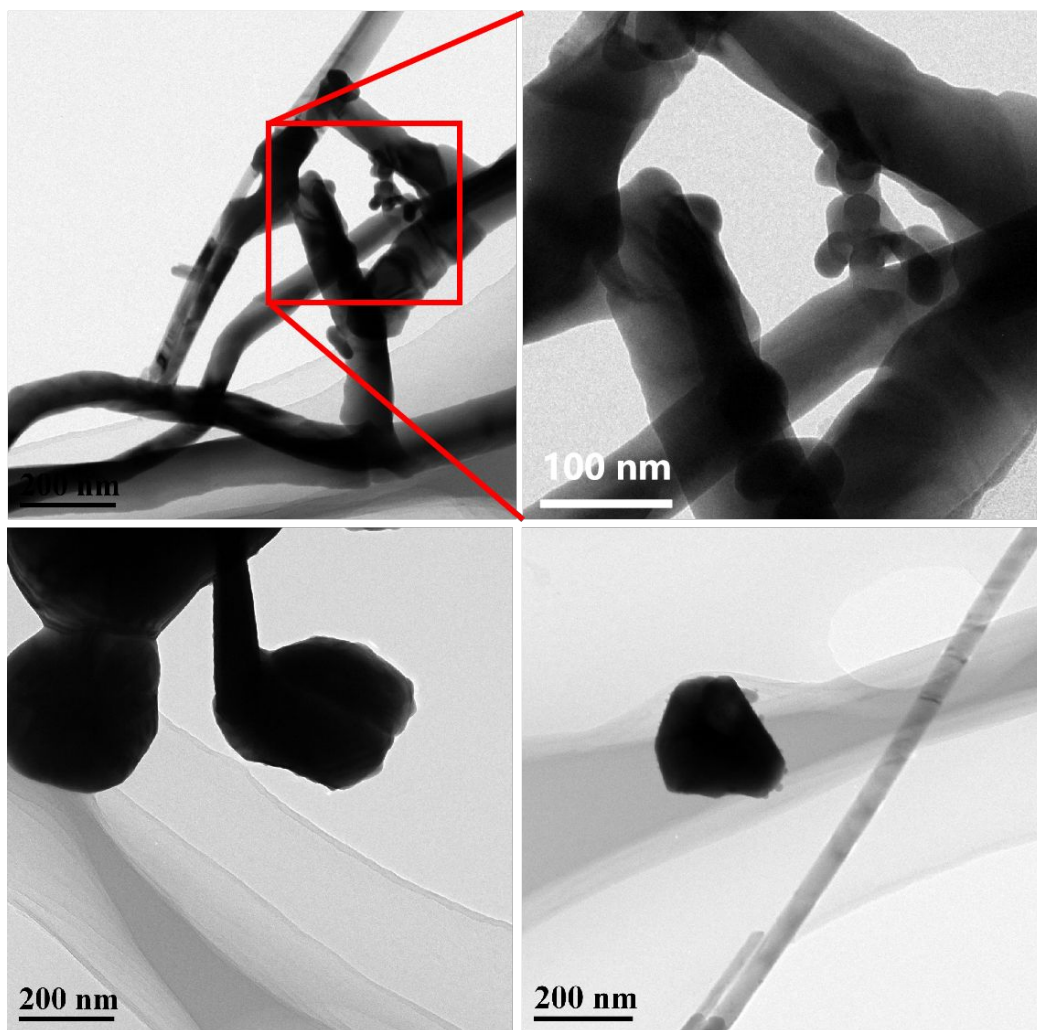

**Figure S1** TEM image of the Ag/ Ag<sub>2</sub>Se composite powders (Ag particles and Ag<sub>2</sub>Se multiscale nanostructures)

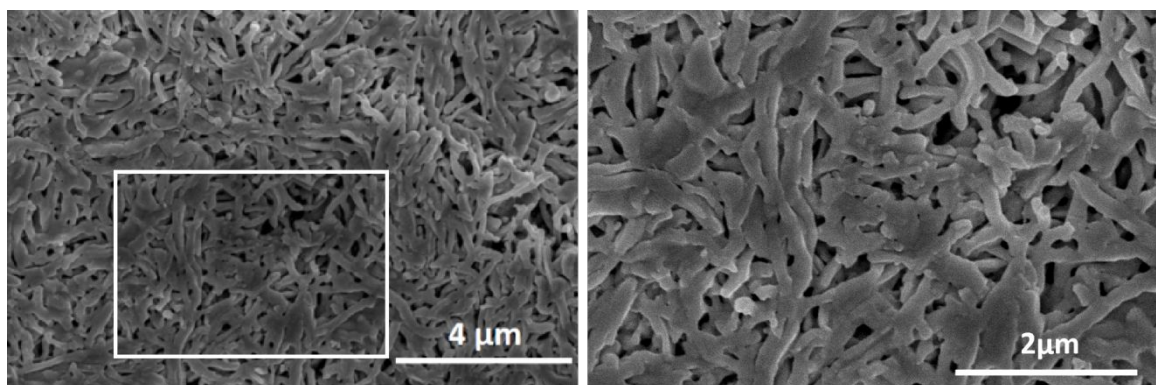

**Figure S2** Surface FESEM image of the synthesized Ag/ Ag<sub>2</sub>Se composite powders after vacuum filtration and then cold-pressing.

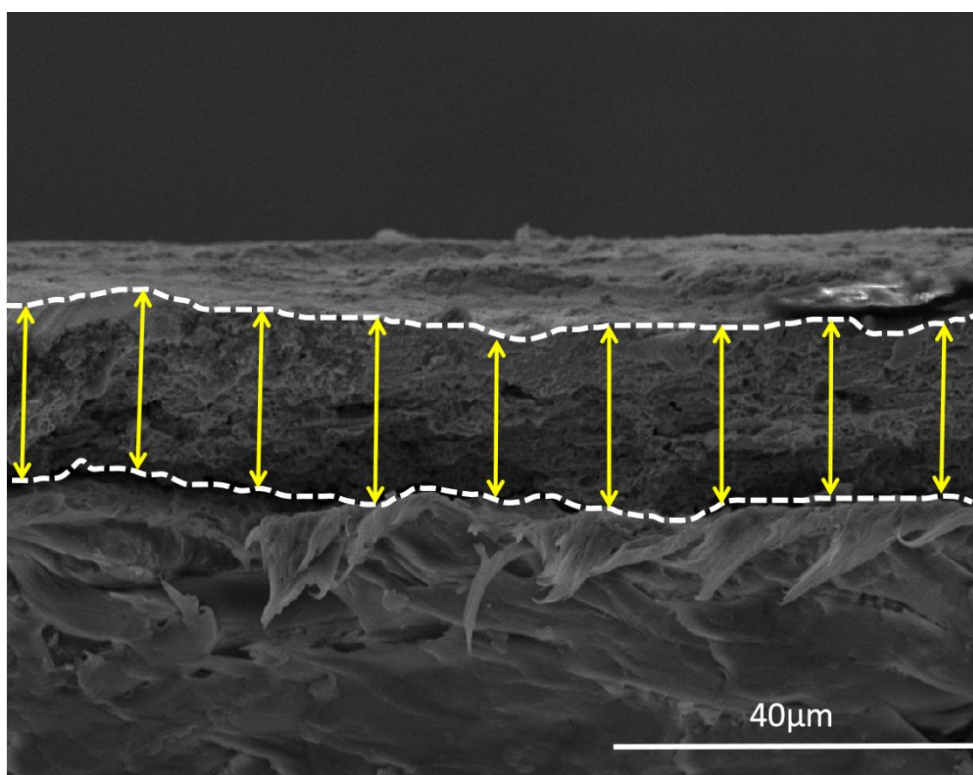

**Figure S3** Fractured surface SEM image of the sample 3 on nylon membrane.

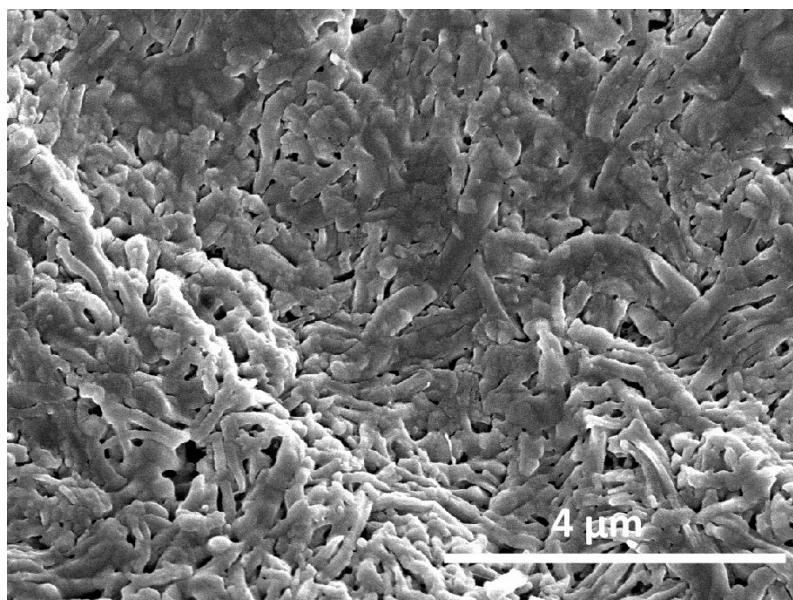

Figure S4 surface SEM image of sample 1

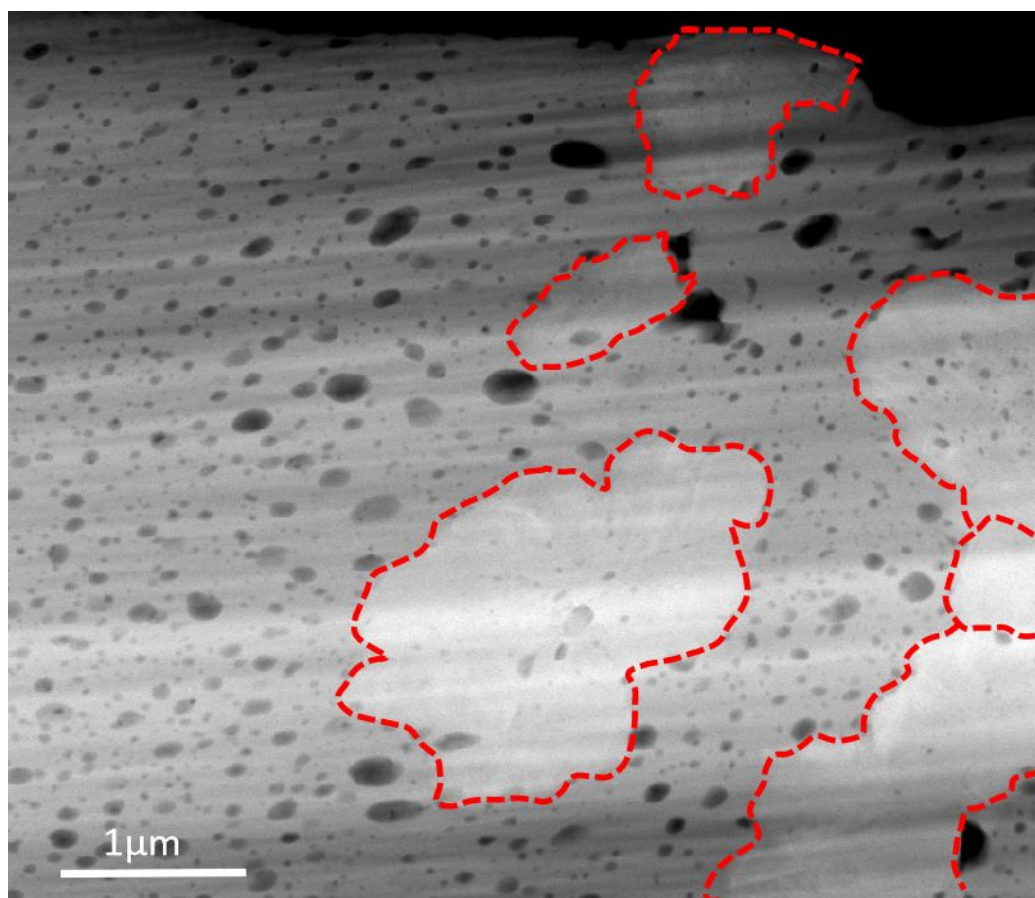

**Figure S5** A TEM image of the sample 3. The Ag grains are marked by red dotted lines.



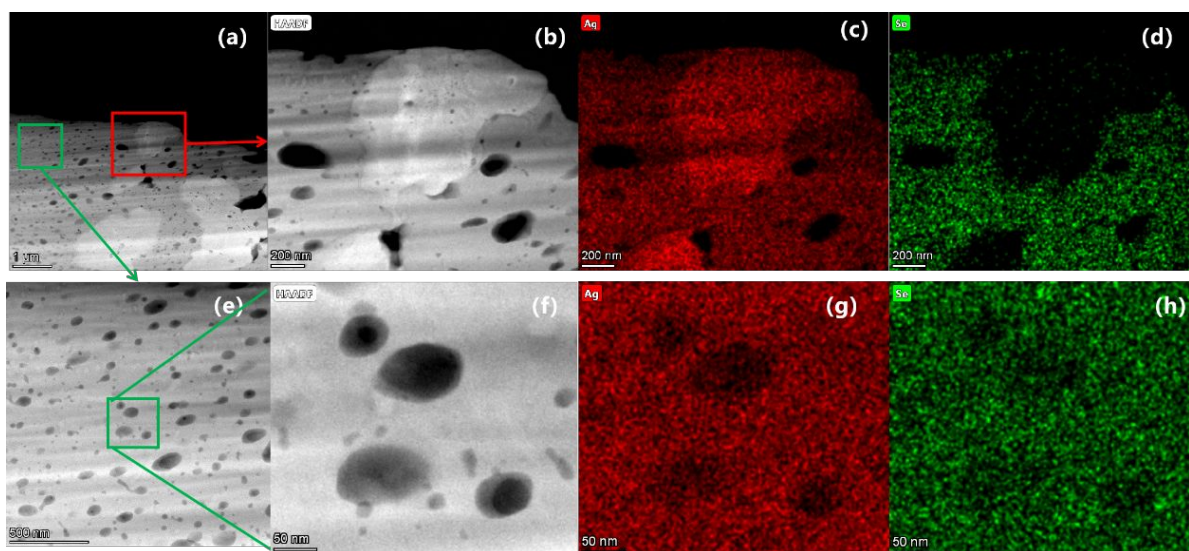

**Figure S6** (a) overview TEM image of sample 3. (b) HAADF image corresponding to the area marked by a red square in (a) and corresponding EDS mappings of the elements Ag (c) and Se (d). (e) overview image of the  $\text{Ag}_2\text{Se}$  phase corresponding to the green square in (a). (f) HAADF image corresponding to the square in (e) and corresponding EDS mappings of the elements Ag (g) and Se (h).

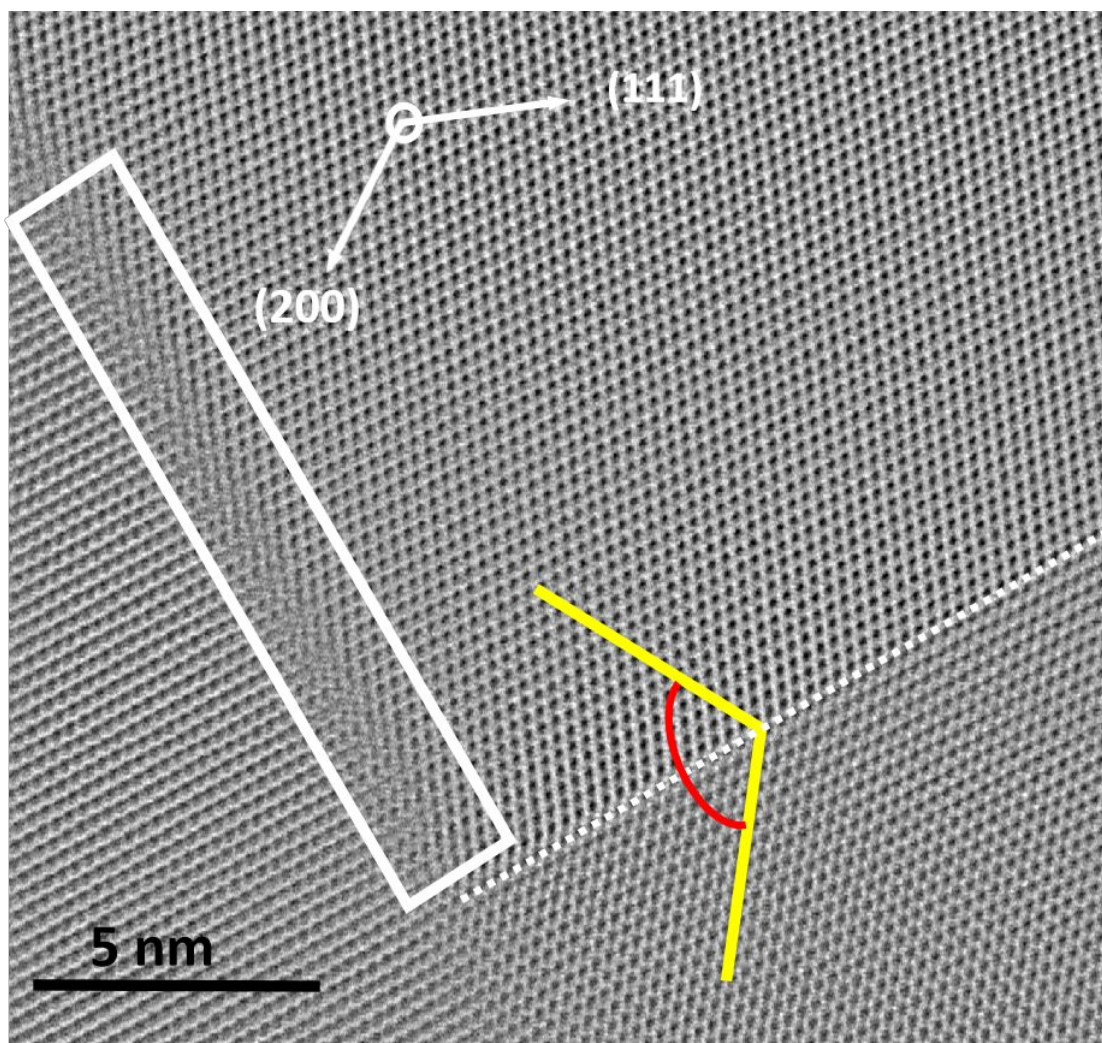

**Figure S7** A HRSTEM image of Ag grains in sample 3.



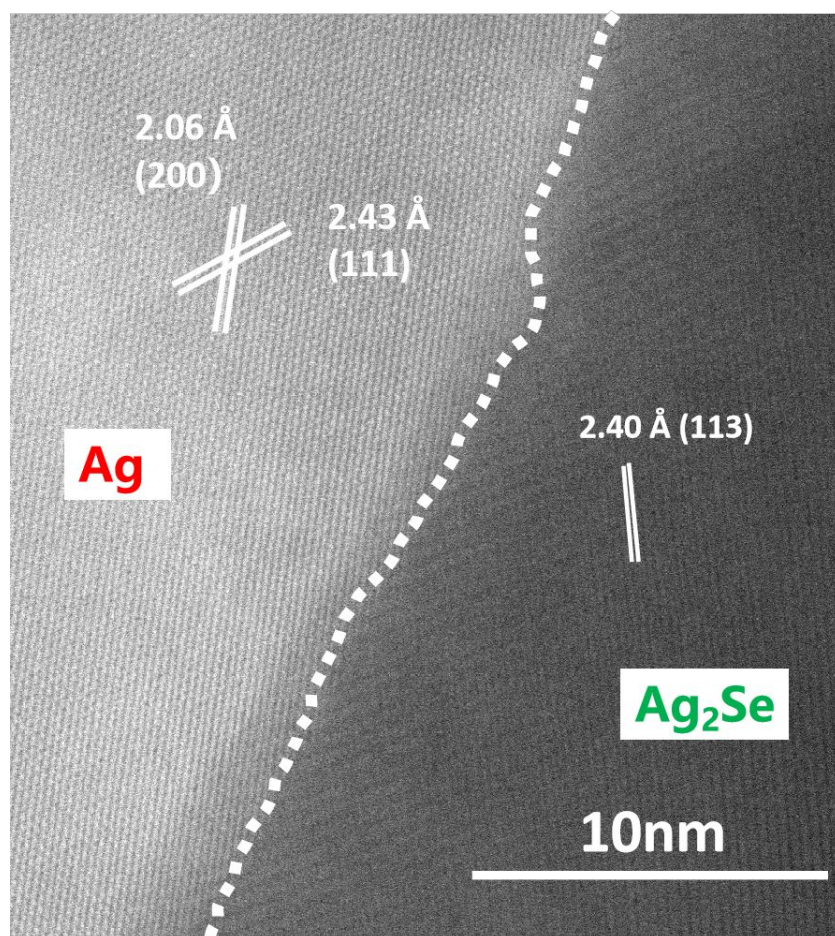

**Figure S8** HRSTEM image of a heterointerface between a Ag grain and Ag<sub>2</sub>Se grain in sample3.

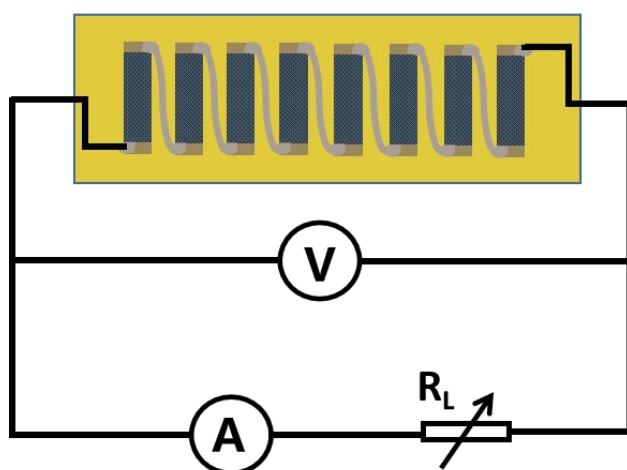

**Figure S9** Schematic illustration of the performance measurement of the TEG

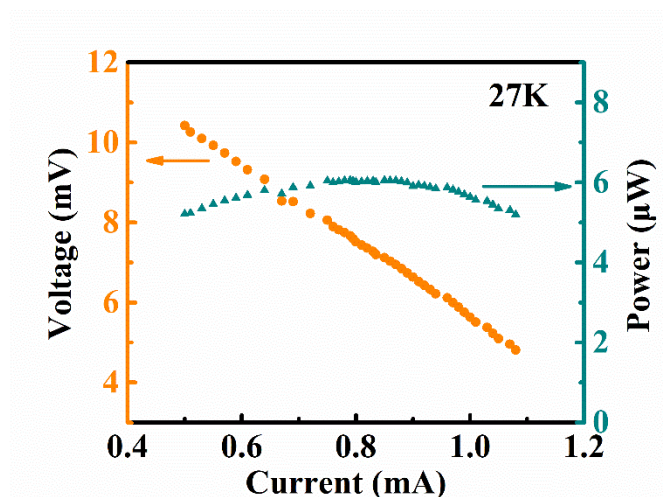

**Figure S10** Output voltage and output power versus current at  $\Delta T$  of 27 K of the TEG after having been stored in a drying cabinet (humidity 20~30%) for three months

### **Note 1 Synthesis of Se NWs**

In a typical procedure, 1 g SeO<sub>2</sub> and 1 g  $\beta$ -cyclodextrin were added into 200 mL distilled water slowly in a glass beaker to form solution A with stirring. Then, 2 g L-ascorbic acid was slowly added into 200mL distilled water to form solution B with stirring. After fully dissolving, the solution A was slowly mixed with solution B under continuous agitation. After stirring for about 4 h at room temperature, the product underwent a process of centrifugation, alternating washing with distilled water and ethanol for several times. The prepared Se NWs were dispersed in ethanol for 2 days. Finally, the prepared Se NWs were redispersed into 400 mL EG and a suspension was formed for further synthesis reaction.

### **Note 2 Assembly of the flexible TE generator**

The optimized film was cut into strips (6 mm  $\times$  20 mm) and pasted on a polyimide (PI) substrate with an interval of  $\sim$  5 mm. Then, a layer of Au was evaporated on two ends of each strip and subsequently Ag adhesive (SPI# 04998-AB) was painted to connect the 8 legs in series.

### **Note 3 Characterization and measurement**

Electrical conductivity at RT was measured using a steady-state four-probe technique with a square wave current ( $\sim$  10 mA in amplitude) by Ecopia HMS-3000. The Seebeck coefficient at RT was determined by the slope of the linear relationship between the thermal electromotive force and temperature difference ( $\sim$  5 K) between two ends of each film. The temperature-dependent TE properties were measured by a Cryoall CTA-3 instrument in He atmosphere, with an instrument test error of  $\pm$ 5% for both  $\sigma$  and S. Hall measurement was performed using the Van der Pauw method (The Lake Shore 8400 Series).

The phase composition of the samples was examined by X-ray diffraction (XRD) (D/MAX 2550VB3+/PCII). The morphology of the samples was observed by field-emission scanning electron microscope (FESEM) (FEI Nova NanoSEM 450). The internal nanostructure of the film was examined by transmission electron microscope (TEM, Titan Themis G2 60-300, Thermo Fisher Scientific). The sample for TEM analysis was fabricated with a focused ion beam (FIB, Helios Nanolab G3 UC, Thermo Fisher Scientific). During FIB processing, in order to avoid ion damage, a thin layer of Pt with thickness of around 2  $\mu$ m was firstly

deposited on the surface of the thin film. A cross-sectional lamella beneath the Pt layer with size of  $10\text{ }\mu\text{m} \times 5\text{ }\mu\text{m} \times 1\text{ }\mu\text{m}$  was cut by high-energy Ga ion beams and was bonded to a post of copper lift-out grid with the FIB easy-lift system. The center area of the lamella was further thinned with low-energy Ga ion beams until the thickness was suitable for TEM observation. The contamination of Ga on the surface lamella was carefully removed after a shower of low-energy Ga ion beam. The film thickness was determined by FESEM observation. The thickness is around  $20\text{ }\mu\text{m}$  and the details can be seen in the fracture surface SEM image in Figure S3. The bending test was performed using a home-made apparatus around a rod with a diameter of 4 mm.

For the TE power generator, its output performance was measured by a self-made simple circuit. Briefly, the value of load resistance in the circuit is adjusted to measure the output characteristics of the device when a certain  $\Delta T$  is applied at both ends of the device (Figure S9).
